# Supplementary material
Source: publisher figshare collection journal article supplement (https://tandf.figshare.com/ndownloader/files/16188350)
Supplement: Supplementary file 1 [file 16188350]

## **Supplement 2 – Vegetation Index Comparison**

SMA-derived V fraction is compared to commonly used spectral vegetation indices for all 43,131,344 MODIS spectra (Fig. S1). The Enhanced Vegetation Index (EVI, (Huete et al. 2002)) and Soil Adjusted Vegetation Index (SAVI, (Huete 1988)) agree with V fraction remarkably well, with 4% bias and 13 to 14% dispersion each. In contrast, the Normalized Difference Vegetation Index (NDVI, (Rouse et al. 1974)) shows much greater dispersion, slope, and curvature while beginning to saturate at fractions below 0.5. NDVI substantially overestimates V fraction, with over 4 times greater bias (18%) and 2 times greater dispersion (29%) than either EVI or SAVI.

Figure S1 here.
